# Supplementary material for: SYT12 plays a critical role in oral cancer and may be a novel therapeutic target
Source: PubMed Central journal article supplement (PMC6775516; doi:10.7150/jca.32582), 2019-08-27

**Supplementary Figure S1**  
**(Quantification of the immunoblotting in Fig. 2E, 3C, 4C, and 4F.)**

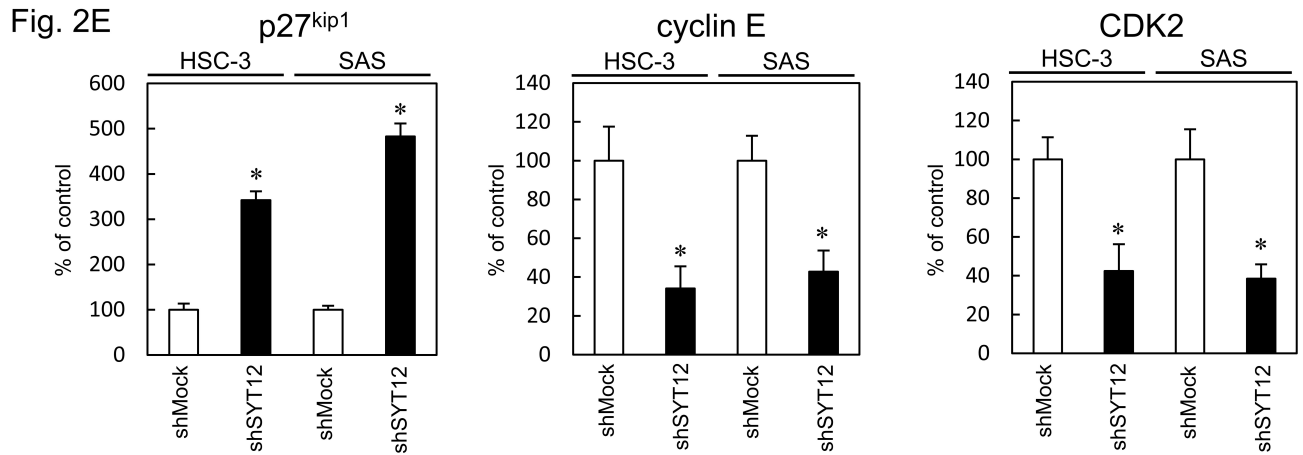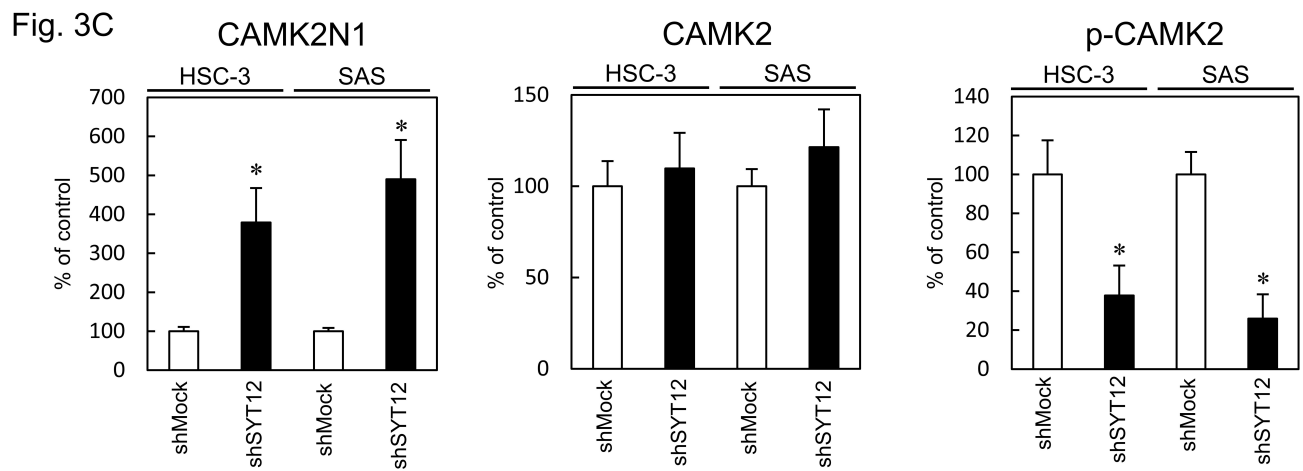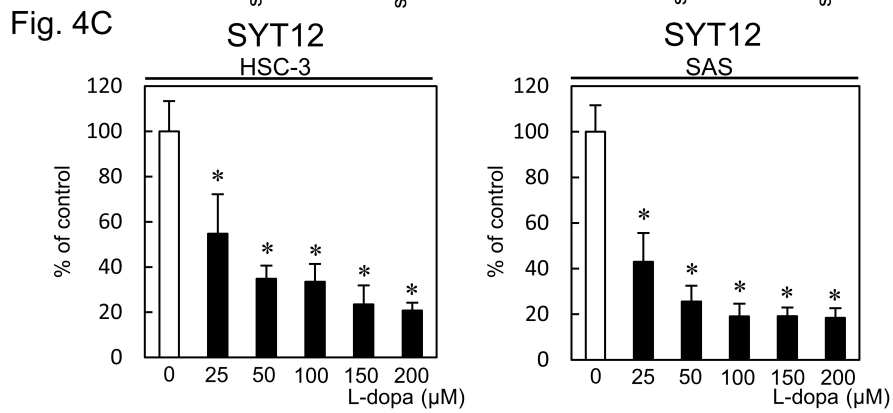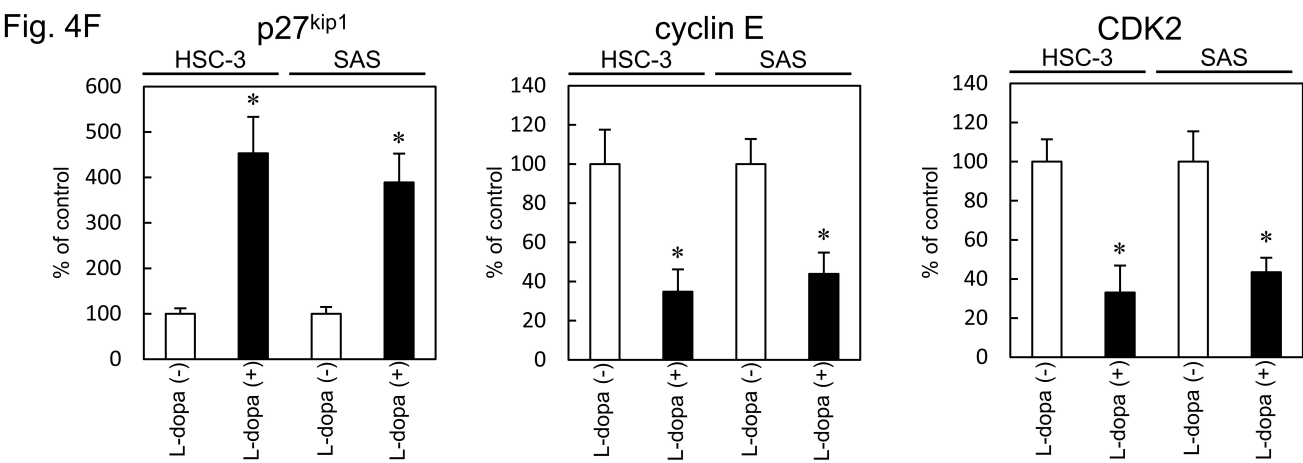

# Supplementary Figure S2 (Full length blots of Fig.1B, 2B, 2E, 3C, 4C and 4F.)

Fig. 1B

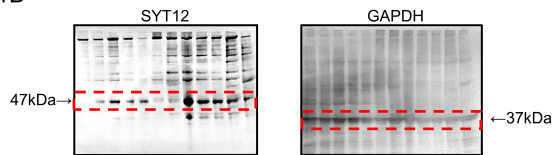

Fig. 2B

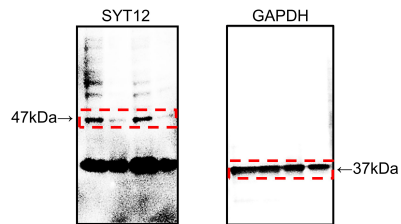

Fig. 2E

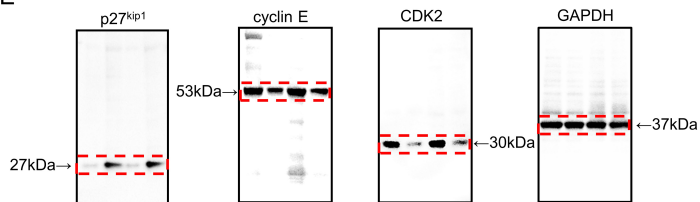

Fig. 3C

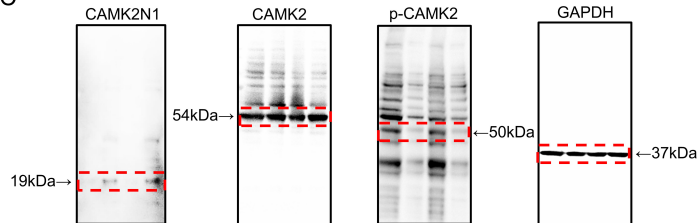

Fig. 4C

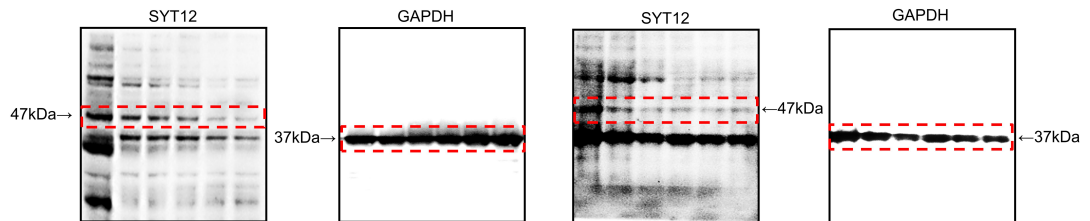

Fig. 4F

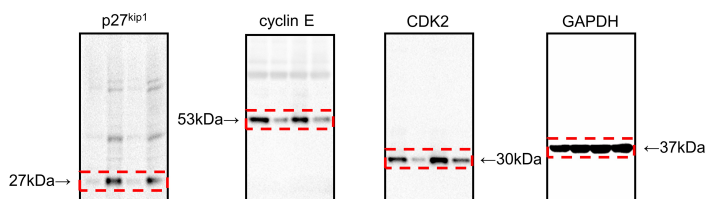

Supplement: jcav10p4913s1.pdf [file jcav10p4913s1.pdf]
